# Supplementary material for: Impact of Neospora caninum Infection on the Bioenergetics and Transcriptome of Cerebrovascular Endothelial Cells
Source: MDPI journal article supplement (doi:10.3390/pathogens9090710), 2020-08-28

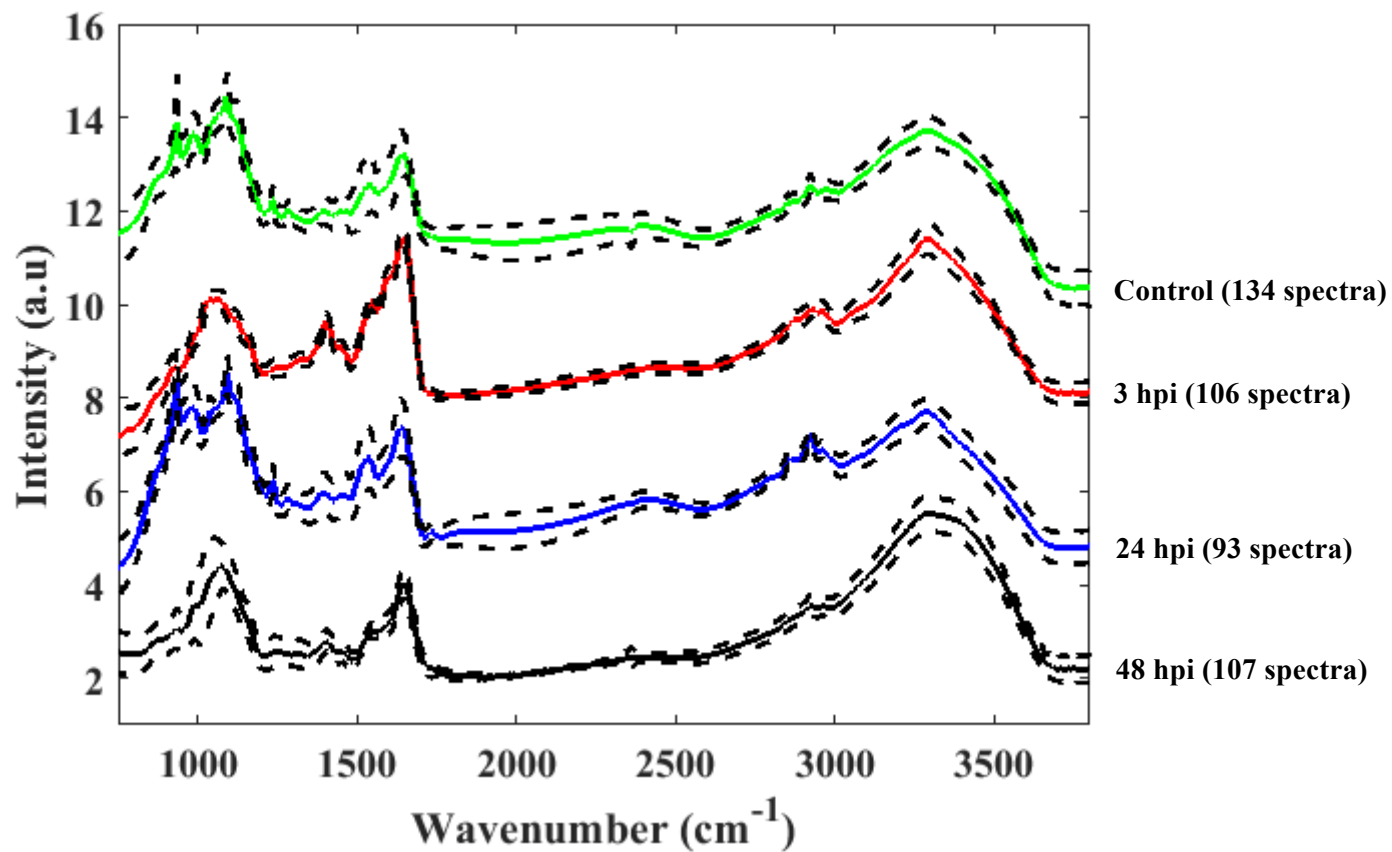

Supplement: s1 [file s1]
