# Supplementary figures and images for: Impact of Neospora caninum Infection on the Bioenergetics and Transcriptome of Cerebrovascular Endothelial Cells
Source: MDPI journal article supplement (doi:10.3390/pathogens9090710), 2020-08-28

(hBMECs)

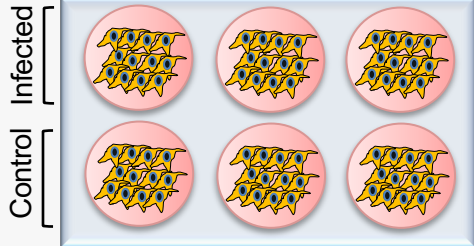

Total RNA isolation

GeneChip Human Gene 1.0 ST

(rBMECs)

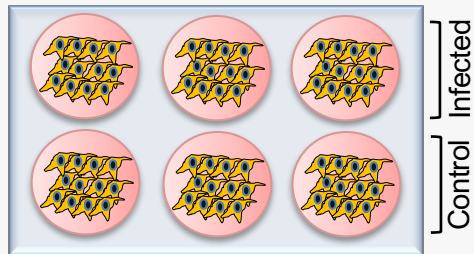

Total RNA isolation

Rat Genome 230 2.0 array

Supplement: s1 [file s1]
